# Supplementary material for: Theoretical study of highly efficient VS2-based single-atom catalysts for lithium–sulfur batteries
Source: Royal Society of Chemistry journal article supplement (doi:10.1039/d3cp04209j), 2023-11-29
Supplement: d3cp04209j1.pdf [file d3cp04209j1.pdf]

## Supporting Information

### **Theoretical Study of Highly Efficient VS<sub>2</sub>-based Single-Atom Catalysts in Lithium-Sulfur Batteries**

Yao Liu<sup>1,2</sup>, Yang Li<sup>1,2</sup>, Jinhui Zhang<sup>1,2</sup>, Jing Xu<sup>2,\*</sup>, Dashuai Wang<sup>1,3,\*</sup>

<sup>1</sup>Institute of Zhejiang University-Quzhou, 324000, China

<sup>2</sup>Department of Physics, College of Science, Yanbian University, Yanji, 133002, China

<sup>3</sup>Key Laboratory of Biomass Chemical Engineering of Ministry of Education, College of  
Chemical and Biological Engineering, Zhejiang University, Hangzhou, 310027, China

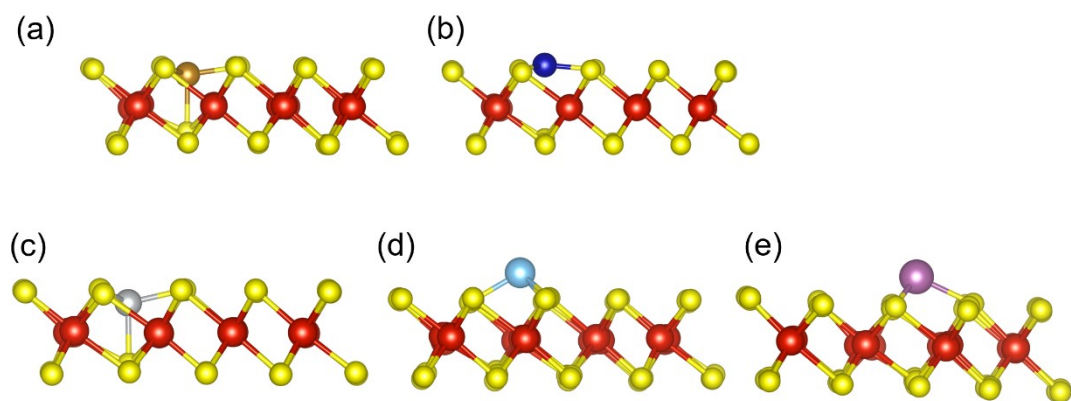

**Fig. S1.** Stable configurations of (a) Fe (b) Co (c) Ni (d) Ti (e) Sc on  $\text{VS}_2$  monolayer.

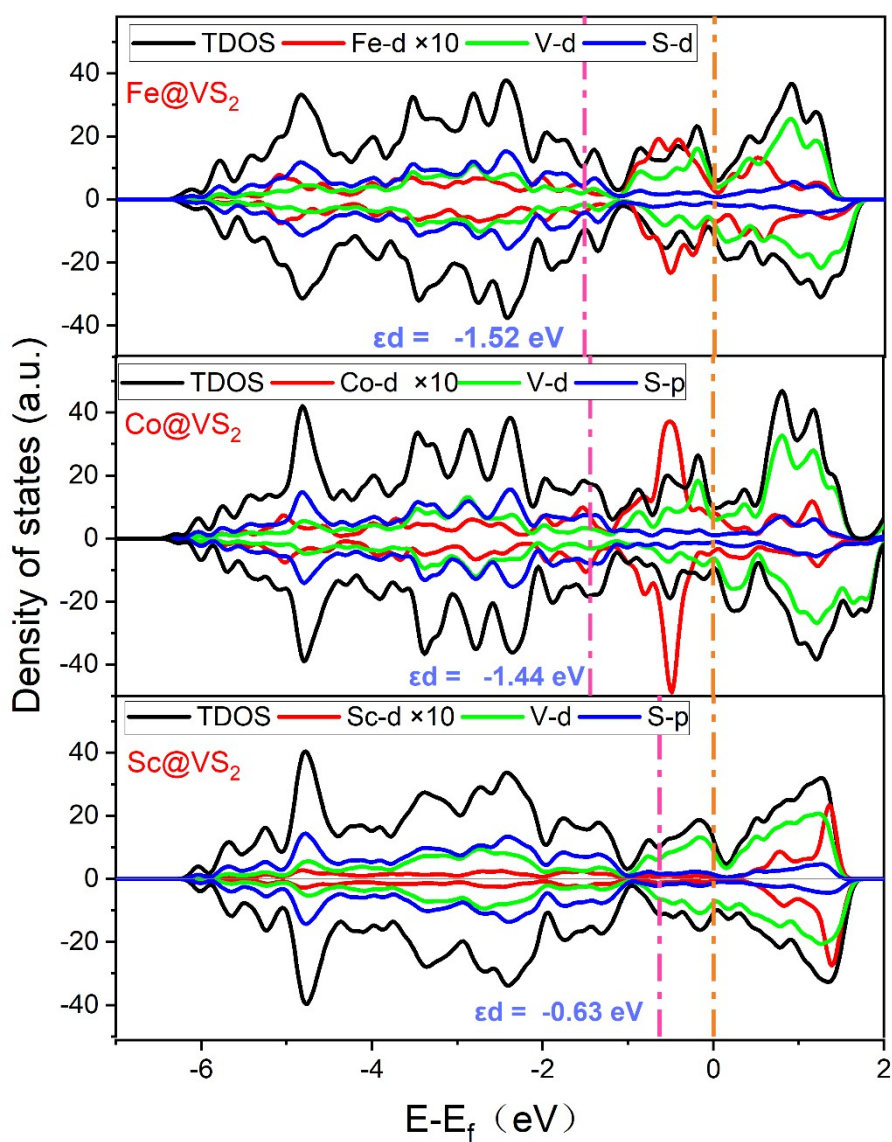

**Fig. S2.** TDOSs and PDOSs of  $\text{Fe@VS}_2$ ,  $\text{Co@VS}_2$  and  $\text{Sc@VS}_2$ .

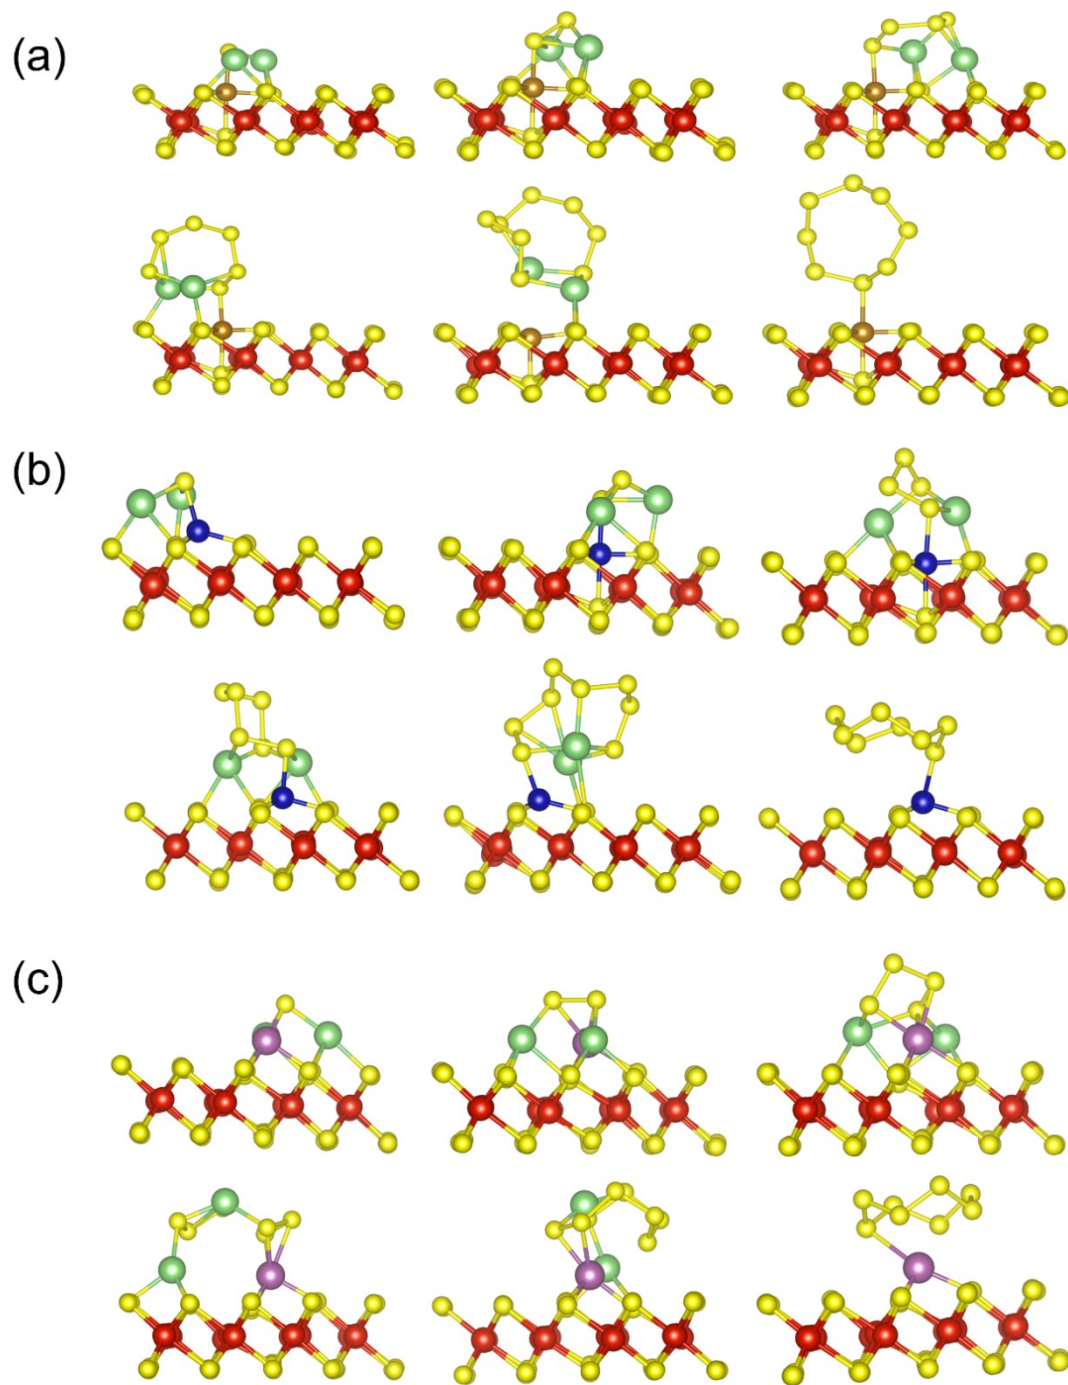

Fi

**g. S3.** The most stable adsorption configurations of  $L_2S_n$  and  $S_8$  on (a)  $Fe@VS_2$  (b)  $Co@VS_2$  and (c)  $Sc@VS_2$ .

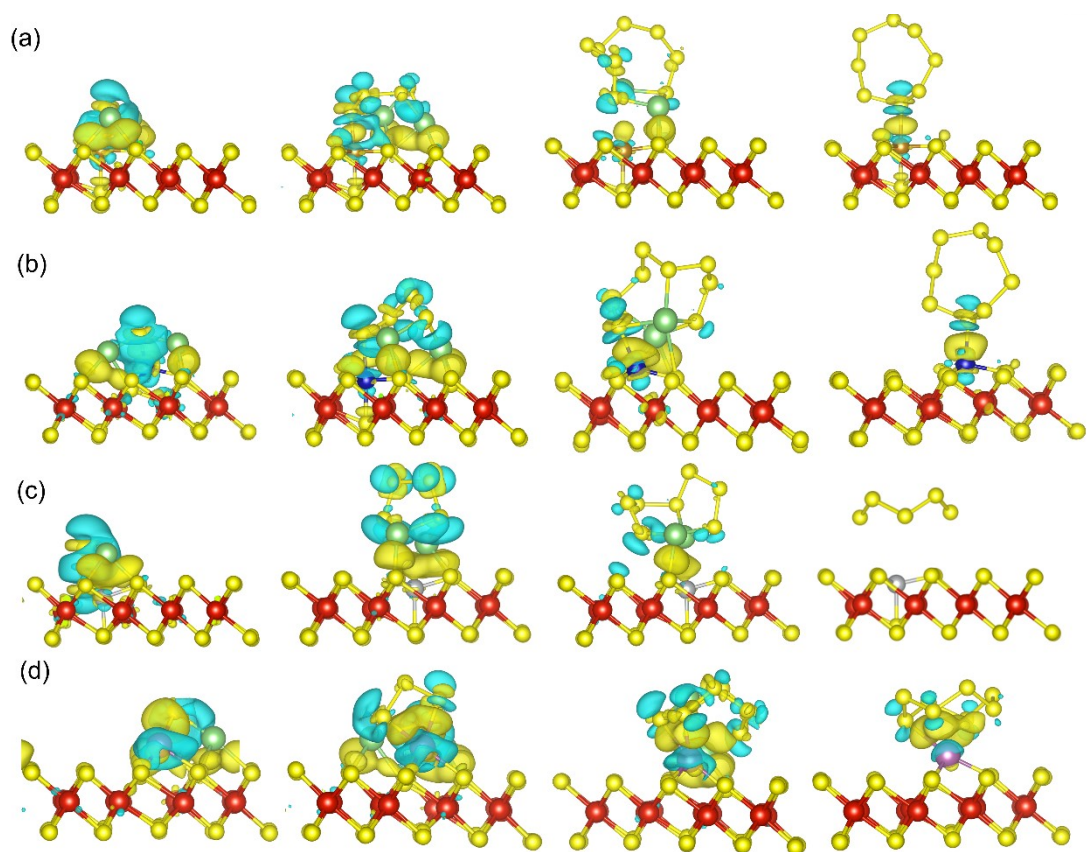

**Fig. S4.** Charge density difference of  $\text{Li}_2\text{S}_n$  ( $n = 1, 4, 8$ ) and  $\text{S}_8$  on (a)  $\text{Fe@VS}_2$  (b)  $\text{Co@VS}_2$  (c)  $\text{Ni@VS}_2$  and (d)  $\text{Sc@VS}_2$ .

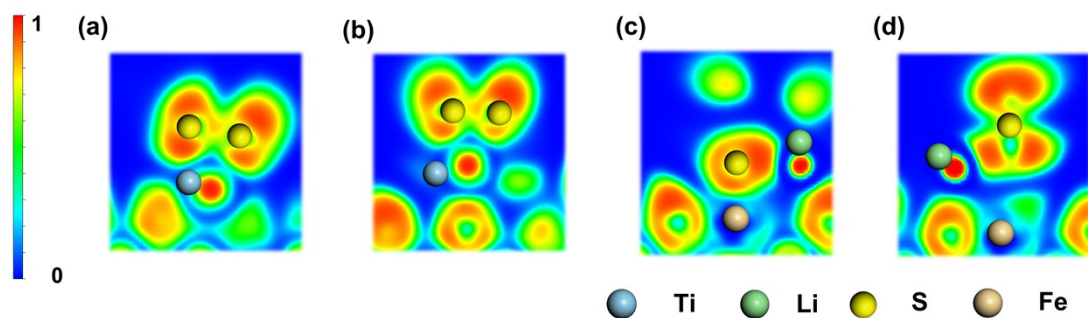

**Fig. S5.** 2D slice of ELF for (a)  $\text{Li}_2\text{S}_6$  and (b)  $\text{Li}_2\text{S}_8$  adsorbed on  $\text{Ti@VS}_2$  substrate. 2D slice of ELF for (c)  $\text{Li}_2\text{S}_6$  and (d)  $\text{Li}_2\text{S}_8$  adsorbed on  $\text{Fe@VS}_2$  substrate.

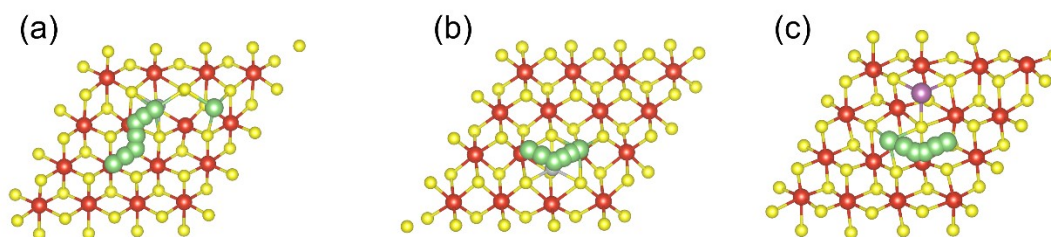

**Fig. S6.** (a) The detailed decomposition path of Li<sub>2</sub>S on Ni@VS<sub>2</sub>. The diffusion pathways of lithium atom on (b) Ni@VS<sub>2</sub> (c) Sc@VS<sub>2</sub>.

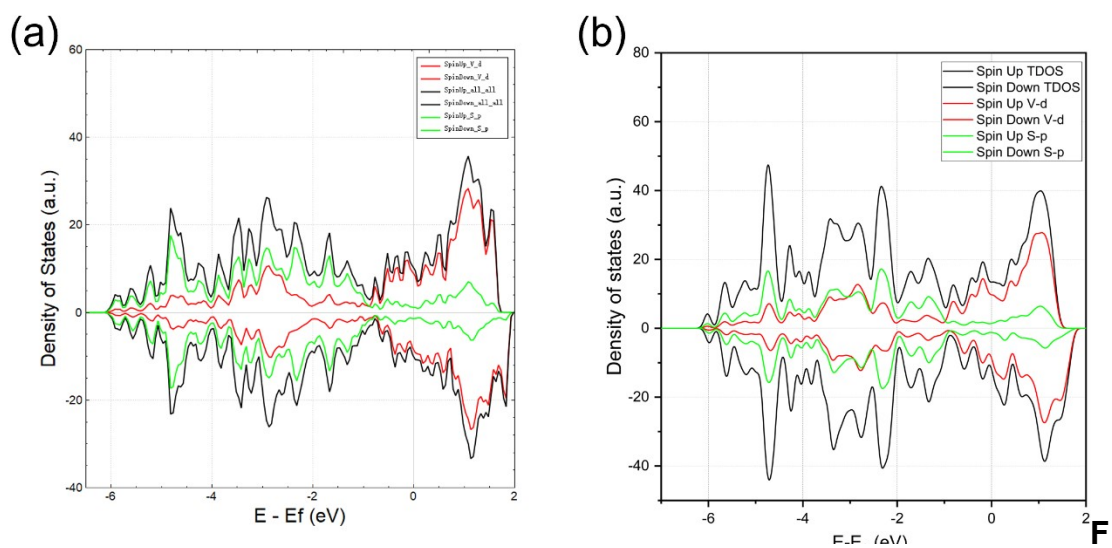

**fig. S7.** PDOSs of VS<sub>2</sub> monolayer. Here, the PDOS by DS-PAW method (a) is consistent with that by Perdew-Burke-Ernzerh of exchange correlation function within the generalized gradient approximation (b).
